# Supplementary material
Source: Elsevier journal article supplement (https://rcastoragev2.blob.core.windows.net/a44cd1c0007b8a965262c548ecf260d2/mmc1.pdf)
Supplement: mmc1 [file mmc1.pdf]

Cell Reports, Volume 9

Supplemental Information

## **The RNA-Editing Enzyme ADAR1**

### **Controls Innate Immune Responses to RNA**

Niamh M. Mannion, Sam M. Greenwood, Robert Young, Sarah Cox, James Brindle,  
David Read, Christoffer Nellåker, Cornelia Vesely, Chris P. Ponting, Paul J. McLaughlin,  
Michael F. Jantsch, Julia Dorin, Ian R. Adams, A.D.J. Scadden, Marie Öhman, Liam P.  
Keegan, and Mary A. O'Connell

## Experimental Procedures

### Editing assays

Editing assays were performed as described previously (Rice et al. 2012). RNA editing was identified as an A-to-G change within the cDNA sequence, and the editing percentage was calculated by  $(G / (A + G)) \times 100$ . Results are the average of at least three separate experiments and are expressed relative to wildtype editing levels, which were normalized to be 100%. Statistical significance was determined by ANOVA with Dunnett's post-hoc tests, or by two-tailed t tests, as appropriate.

### RNA extraction and gene expression analysis by qRT-PCR

Total RNA was extracted with Trizol reagent (Invitrogen) and treated with TURBO DNase (Ambion, Life Technologies). The isolated RNA was reverse transcribed with Superscript II (Invitrogen) with oligo-dT or random hexamers according to the manufacturers' instructions. Quantitative PCR was subsequently performed with gene-specific primers (Table S4) and SYBR Green I Master reagent (Roche) using the Lightcycler 480 system (Roche). Analysis of target gene expression was calculated by relative quantification ( $2^{-\Delta\Delta C_t}$ ) as described (Livak and Schmittgen, 2001), with all genes being normalized to the housekeeping genes. Statistical significance was determined by One-way Analysis of Variance (ANOVA) with Bonferroni's or Dunnett's post-hoc tests, or by unpaired two-tailed Student's t-tests, as appropriate.

### *Fluc* mRNA and short dsRNA oligonucleotide transfections

Short dsRNAs were designed from Dharmacon and capped *Fluc* mRNA was *in vitro* transcribed from pLuc-MCS as described (Wormington et al., 1996). *Adar1*<sup>-/-</sup>; *p53*<sup>-/-</sup> PiggyBac MEFs were transfected in six-well plates at a confluency of  $2 \times 10^5$  with Lipofectamine-2000 (LF-2000; Invitrogen). Typically, cells were transfected with 120 pmol dsRNA (80 pmol specific and 40 pmol control) and 500 ng *Fluc* mRNA (400 ng *Fluc* and 100 ng Rluc). Mock transfections were performed with LF-2000 alone. Cells were harvested 6, 12 or 24 hr post-transfection.

### Mouse Embryonic Fibroblast cultures

At E10.5 whole embryos were minced and cultured in high-glucose DMEM with 10% FCS, 1% sodium pyruvate, 1% NEAAs and 1% penicillin/streptomycin, initially in a 6-well plate (Cellstar) and then transferred into 25cm<sup>2</sup> flasks. For nutrient starvation, culture medium was replaced with DMEM and 1% penicillin/streptomycin for either 72 or 144 hours.

### **Staged mouse embryo collection.**

Embryos were taken at defined time points (E10.5, E11.5 etc.) with noon on the morning that a plug was detected being defined as E0.5. The embryos were dissected out of the uteri and yolk sacs and were imaged on a Leica stereo microscope with an exposure time of 0.05s and automatic color balancing. Staging was confirmed using morphological features.

### **Mouse Histology, Haematoxylin and Eosin staining**

Sections were cleared in xylene then rehydrated in serial dilutions of alcohol. The samples were stained with Mayers haematoxylin for 4 minutes and aqueous eosin for 2 minutes, dehydrated in alcohol and xylene and mounted in DPX. Sections were viewed with color brightfield imaging (Zeiss Axioplan II) and an exposure time of 0.05s.

### **Mouse genotyping**

The tails tips were removed and treated with DNAREleasey (Anachem) according to manufacturer's instructions. Genotypes were verified by PCR with Platinum Taq (Invitrogen). Primers used for genotyping of *Adar1*<sup>-/-</sup> and *Ifnar1*<sup>-/-</sup> genotypes were as in previous publications (Hartner et al., 2004; Yoshida et al., 2005). Primers used for genotyping of *Mavs*<sup>-/-</sup> were as follows:

*Mavs*<sup>+</sup> sense, 5'-CAAGTGGGAATCCAGTGAATCAG-3';

*Mavs*<sup>+</sup> antisense, 5'-AGGAGAGCCAAGAATGGGAAGC-3';

*Mavs*<sup>-</sup> sense, 5'-TTAGGATTGGCTCGGCAGTTAG-3';

*Mavs*<sup>-</sup> antisense, 5'-TTCAGATGTAGAAGGCGATGGG-3'.

### **Mouse transcriptome analyses**

RNA-Seq reads were mapped to the mm9 assembly with TMAP (available from <http://ioncommunity.lifetechnologies.com/docs/DOC-2101>), with reads that mapped to multiple locations randomly assigned a best-scoring location. All other parameters were left at their default. Transcripts were assembled separately for each tissue sample and genotype with Cufflinks, and differential expression between these was assessed by Cuffdiff (Machnicka et al., 2013). Transcripts which contained repetitive elements were identified by intersecting them with RepeatMasker annotations (Smit, AFA, Hubley, R & Green, P. RepeatMasker Open-3.0. 1996-2010 <http://www.repeatmasker.org>).

To identify changes in expression at specific repetitive element loci in the polyA+ RNA Seq data, paired RNA sequencing reads were mapped to the mm9 assembly of the mouse genome and the UCSC

'known gene' model with TopHat (<http://tophat.cbcb.umd.edu/>) under stringent conditions allowing no mismatches, insertions or deletions. Reads mapping to unique sites in the genome were recovered by filtering the resulting alignments, and intersected with Repeatmasker annotations of the mouse genome (<http://genome.ucsc.edu/>). Loci associated with more than 1 read for every million mapped reads in the library were considered further. For these loci, differences in read abundance between datasets were identified with EdgeR (<http://www.ncbi.nlm.nih.gov/pmc/articles/PMC2796818/>) in R (<http://www.r-project.org/>).

An additional set of co-ordinates corresponding to LTR-flanked endogenous retroviruses was generated from the UCSC Repeatmasker annotations of the mm9 assembly of the mouse genome in a manner similar to that previously described (Karimi et al., 2011). Briefly, LTR loci belonging to the same repetitive element that were separated by less than 9kb and in the same orientation were assembled into pairs. LTR pairs were annotated based on any internal LTR retrotransposon sequence present between the LTRs, and LTR pairs flanking only sequences belonging to the same LTR retrotransposon were selected. Mapped reads overlapping these LTR-flanked endogenous retrovirus co-ordinates were identified and analyzed as described for the Repeatmasker annotations.

### **Molecular modeling of dsRNA and RIG-I structures.**

Images and superpositions were made with UCSF-Chimera (Pettersen et al., 2004). See Protein Data Base (PDB), for references to structures.

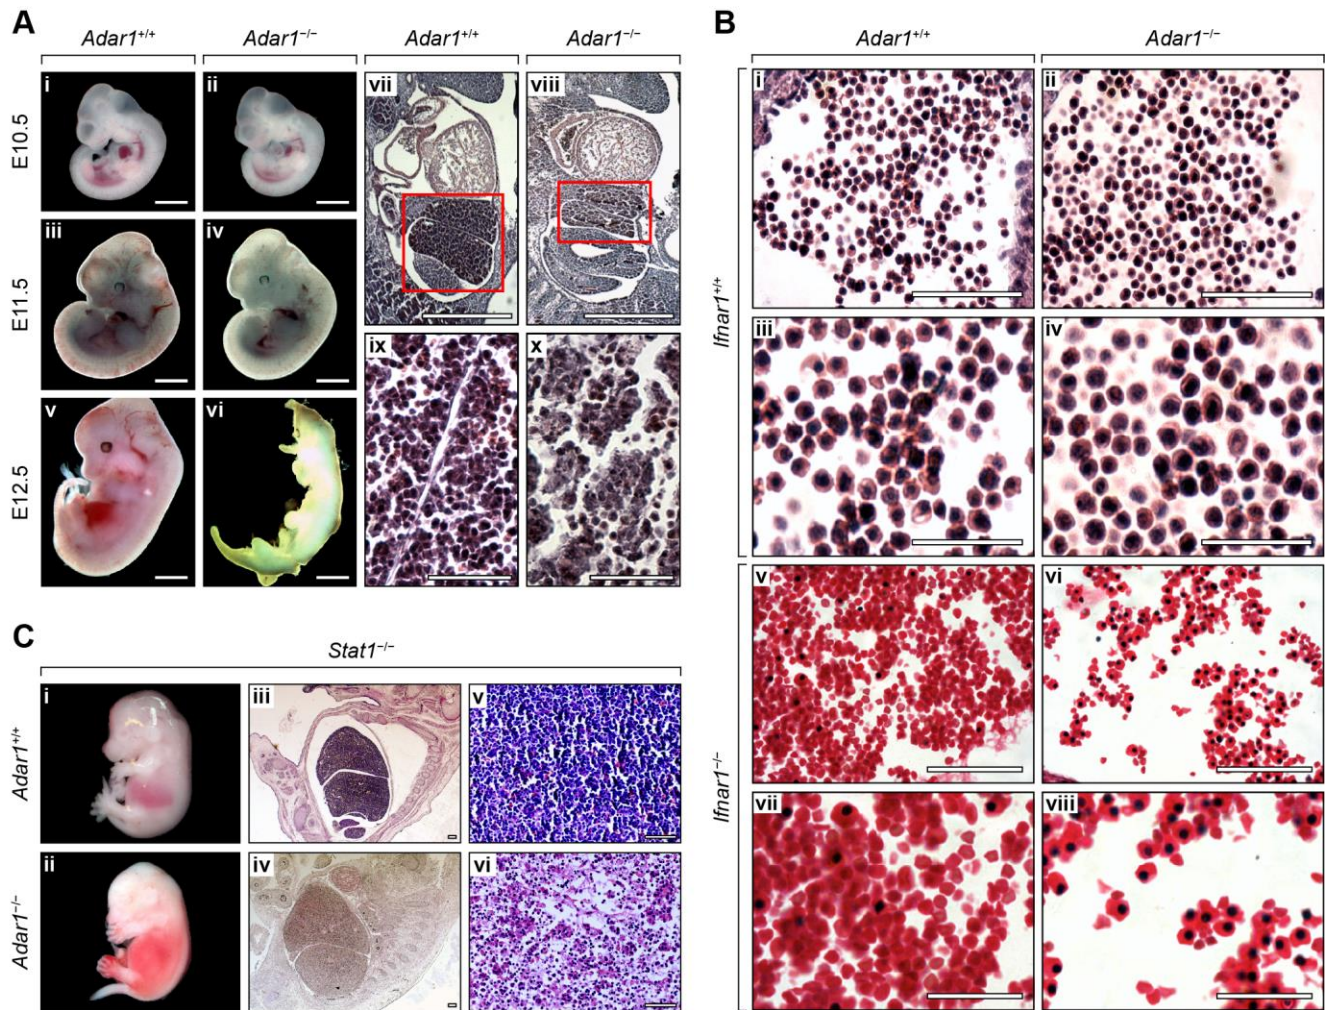

**Figure S1, Related to Figure 1. Viability, liver integrity, and peripheral blood in *Adar1* mutant fetal mice.**

(A) Viability and liver integrity in *Adar1* mutant fetal mice. (i-vi) Whole embryos of wildtype (i, iii, v) and *Adar1* mutant (ii, iv, vi) progeny at E10.5 (i, ii), E11.5 (iii, iv) and E12.5 (v, vi). (vii-x) Whole embryo (vii, viii) and corresponding liver sections (ix, x) of wildtype (vii, ix) and *Adar1* mutant (viii, x) progeny at E11.5. Fetal livers outlined by red boxes. Scale bars: i-viii, 1 mm; ix and x, 50  $\mu$ m. (B) Peripheral blood in *Adar1*; *Ifnar1* mutant fetal mice. (i-iv) Erythrocytes of wildtype (i, iii) and *Adar1* mutant (ii, iv) progeny at E11.5. (v-viii) Erythrocytes of *Ifnar1* (v, vii) and *Adar1*; *Ifnar1* (vi, viii) mutant progeny at E15.5. Scale bars: i, ii, v, vi, 50  $\mu$ m; iii, iv, vii, viii, 25  $\mu$ m. (C) Viability and liver integrity in *Adar1*; *Stat1* mutant fetal mice. Whole embryos (i, ii) and corresponding liver sections (iii-vi) of *Stat1* (i, iii, v) and *Adar1*; *Stat1* (ii, iv, vi) mutant progeny at E14.5. Scale bars: 100  $\mu$ m.

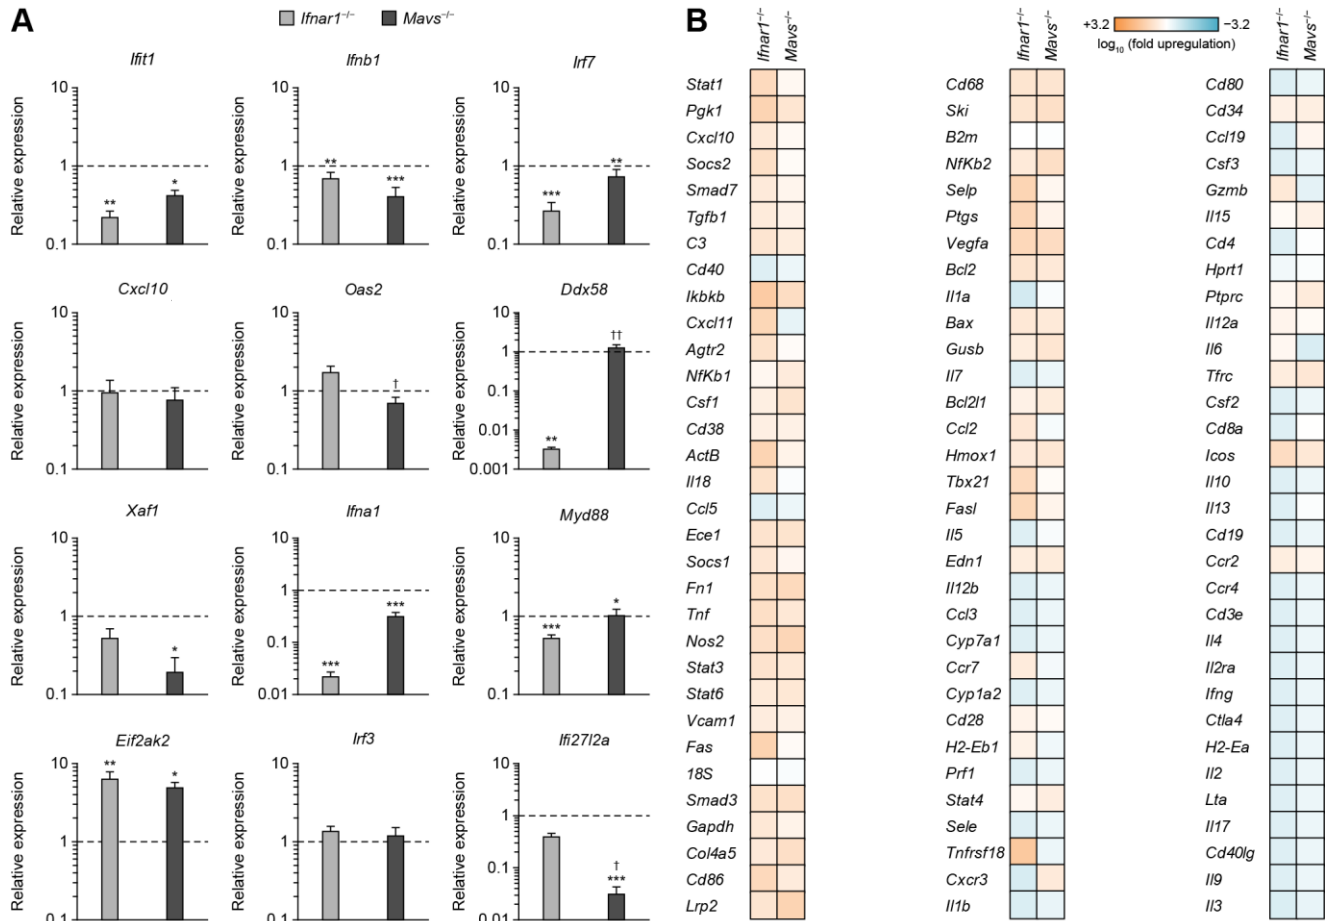

**Figure S 2, Related to Figure 3. Pro-inflammatory cytokine expression in *Ifnar1* and *Mavs* mutant embryos.**

(A) Expression levels for an array of twelve ISGs measured in *Ifnar1* and *Mavs* mutant E11.5 whole embryos. For each gene, values are expressed relative to wildtype (WT) levels, which are all 1 (dashed lines). Error bars, s.e.m. \*  $p < 0.05$ ; \*\*  $p < 0.01$ ; \*\*\*  $p < 0.001$  versus WT; †  $p < 0.05$ ; ††  $p < 0.01$  versus *Ifnar1<sup>-/-</sup>*. (B) Heat map showing expression levels for an array of 96 pro-inflammatory cytokines measured *Ifnar1* and *Mavs* mutant E11.5 whole embryos. For each gene, values are expressed relative to WT levels, which are all 0 following  $\log_{10}$ -transformation and hence are not shown (white in color).



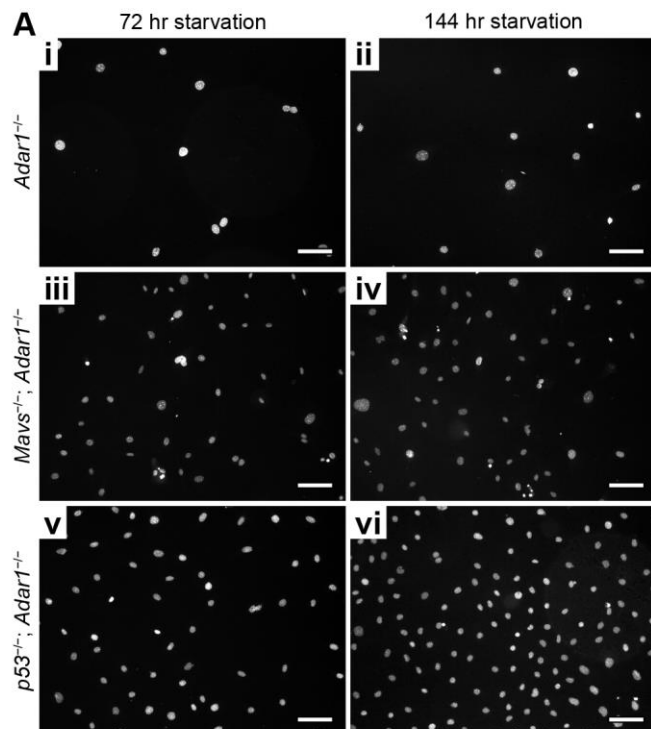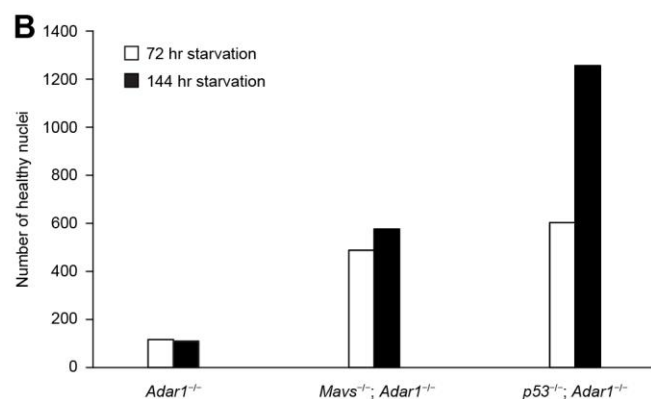

**Figure S3, Related to Figure 5. Survival of cultured *Adar1* mutant mouse embryonic fibroblasts (MEFs) following nutrient starvation.**

(A) DAPI staining of *Adar1* (i, ii), *Adar1*; *Mavs* (iii, iv) and *Adar1*; *p53* (v, vi) mutant MEFs following nutrient starvation for 72 (i, iii, v) or 144 hours (ii, iv, vi). Scale bars: 100  $\mu$ m. (B) Quantification of survival of *Adar1*, *Adar1*; *Mavs* and *Adar1*; *p53* mutant MEFs following nutrient starvation for 72 or 144 hours.

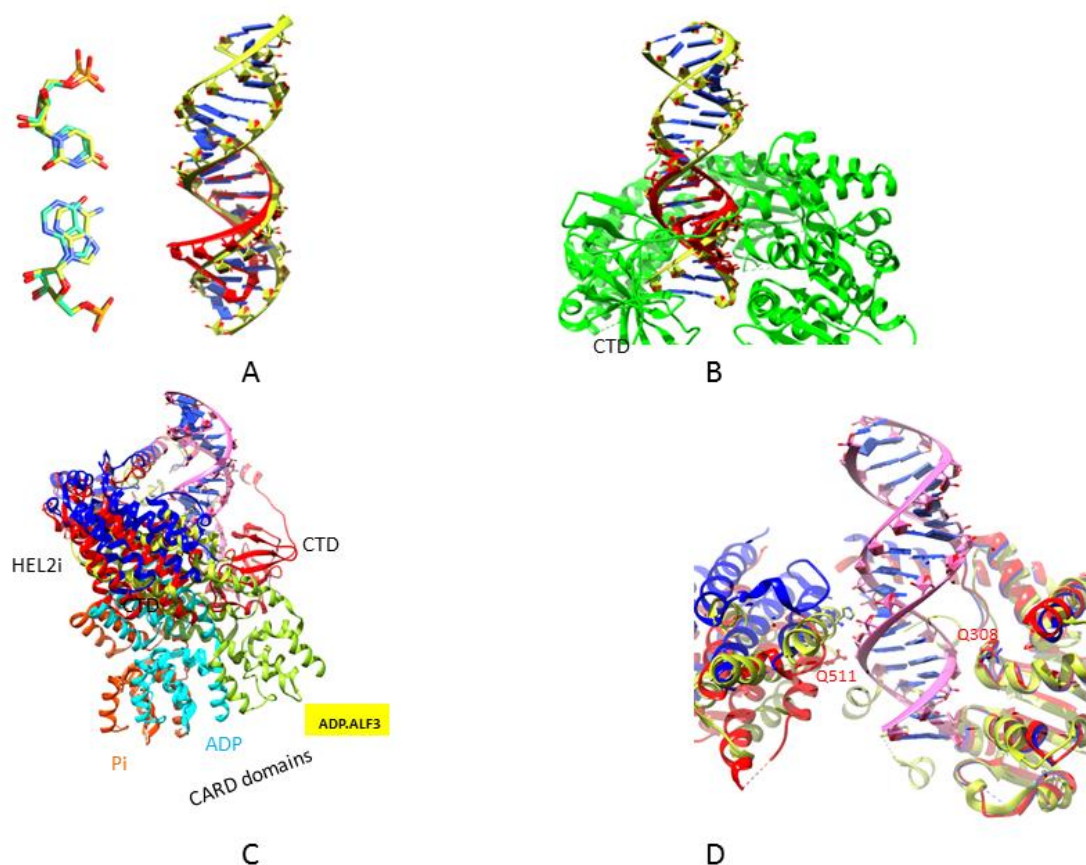

**Figure S4 Related to Figure 5. Alterations in dsRNA structure due to I-U wobble base pairs and predicted effects on RLR interactions with edited dsRNA.**

(A) Comparison of A-U base pair (carbons yellow) with I-U base pair (carbons green) shows that inosine or uracil form the wobble base pair when one of the bases moves inwards, leaving an indent in the surface of the minor groove. I-U wobble base pairs also distort the path of IU dsRNA (red) compared to canonical dsRNA (yellow). A structure of a tandem two IU-containing dsRNA (pdb code 409D) was superposed on dsRNA (yellow) from the RIG-I ADP- $\text{AlF}_3$  complex (code 4a36). Bases upstream of I-U wobble base pairs were used to make the dsRNA superposition in order to show how distortion due to two IU bases redirects the RNA backbone. (B) Superposition of the two IU dsRNA structure on the bound dsRNA in a structure of dsRNA-bound, nucleotide-free RIG-I. The distortion of the dsRNA path by the two I-U base pairs directs the RNA (red) away from the path of canonical RNA (yellow) so that contacts with the CTD are not made in the same way and the RNA may pass over the CTD and out of the complex. When more than two tandem I-U base pairs are present all such structural effects are expected to be more severe. The image shows two IU dsRNA (code 409D; red) superposed on dsRNA in the structure of nucleotide free RIG-I-dsRNA complex (code 2zda; green). (C) The HEL2i domains of RIG-I transition from one base to the next along the minor groove of regular dsRNA during the nucleotide hydrolysis cycle. The image shows superposed conformations that capture the structure and domain movements of RIG-I at sequential steps in the ATP binding, hydrolysis and release cycle (Kowalinski et al., 2011; Luo et al., 2011). Conformations are: with phosphate (red; code 2ykg); with ADP (blue; code 3zd7) and with ADP- $\text{AlF}_3$  (yellow; 4a36). All structures were superposed through fitting their dsRNA onto the dsRNA (pink) in the ADP- $\text{AlF}_3$  structure. Release of 2CARD domains for signaling may not be due primarily to structural clashes with other domains during the hydrolysis cycle. Pendant 2CARD domains modeled back onto the HEL2i domain at steps in the ATP hydrolysis cycle



do not clash dramatically with the CTD. To predict the position of the 2CARD domain at each step in the cycle 2CARD domains were modeled onto each state of RIG-I using the HEL2i contacts observed in the 2CARD domain-containing RNA-free RIG-I structure (code 4a2w) via superposition of HEL2i domains. Corresponding 2CARD domains are shown in different hues of the color of the state to which they have been modeled. (D) The HEL2i domain moves in one base steps around the minor groove and along one strand of regular dsRNA in the different conformations (same colors as in C). Protein structure behind the plane of the RNA has been removed to give a clearer view of the RNA contacts. Note that Q511 in HEL2i and the alpha helices in the lower part of HEL2i are in different positions as the nucleotide hydrolysis cycle progresses (the residue equivalent to Q511 is a histidine in the duck RIG-I:RNA:ADP.AIF<sub>3</sub> structure, code 4A36, yellow). On the other hand Q381 in HEL1 and its following loop do not change positions substantially even though the superposition is made using only the dsRNA; movements of HEL1 and HEL2 domains along the dsRNA major groove are not captured in this series of dsRNA blunt end-associated RIG-I complexes. Release of 2CARD from Hel2i may be responsive to perturbations in Hel2i-RNA interaction caused by I-U base pairs or other irregularities in the dsRNA.

**Table S1, Related to Figure 1. Survival of mouse embryos with different *Adar1* genotypes in the C57Bl6N/129 mixed genetic background and from crosses of *Adar1*<sup>+/-</sup>, *Adar1*<sup>+/-</sup>; *Stat1*<sup>-/-</sup> or *Adar1*<sup>+/-</sup>; *Ifnar1*<sup>+/-</sup> C57Bl6N/129 parents.**

| Parents                                                                                                                       | Day    | Litters                      | Embryos                     | <i>Adar1</i> <sup>+/+</sup> | <i>Adar1</i> <sup>+/-</sup> | <i>Adar1</i> <sup>-/-</sup> | Exp. -/- |
|-------------------------------------------------------------------------------------------------------------------------------|--------|------------------------------|-----------------------------|-----------------------------|-----------------------------|-----------------------------|----------|
| <i>Adar1</i> <sup>+/-</sup><br>×<br><i>Adar1</i> <sup>+/-</sup>                                                               | E 10.5 | 3                            | 22                          | 4                           | 14                          | 4                           | 5.50     |
|                                                                                                                               | E 11.5 | 2                            | 22                          | 10                          | 10                          | 2                           | 5.50     |
|                                                                                                                               | E 12.5 | 4                            | 17                          | 6                           | 9                           | 2                           | 4.25     |
|                                                                                                                               | E 13.5 | 2                            | 12                          | 5                           | 7                           | 0                           | 3.00     |
|                                                                                                                               | E 14.5 | 2                            | 15                          | 6                           | 9                           | 0                           | 3.75     |
|                                                                                                                               | E 15.5 | 1                            | 5                           | 2                           | 3                           | 0                           | 1.25     |
|                                                                                                                               | Total  |                              | 93                          | 33                          | 52                          | 8                           |          |
| <i>Adar1</i> <sup>+/-</sup> ; <i>Stat1</i> <sup>-/-</sup><br>×<br><i>Adar1</i> <sup>+/-</sup> ; <i>Stat1</i> <sup>-/-</sup>   | E12.5  | 1                            | 11                          | 1                           | 8                           | 2                           | 2.75     |
|                                                                                                                               | E14.5  | 2                            | 12                          | 4                           | 5                           | 3                           | 3.00     |
|                                                                                                                               | E15.5  | 4                            | 8                           | 5                           | 3                           | 0                           | 2.00     |
|                                                                                                                               | E17.5  | 1                            | 4                           | 1                           | 3                           | 0                           | 1.00     |
|                                                                                                                               | Total  |                              | 35                          | 11                          | 19                          | 5                           |          |
| <i>Adar1</i> <sup>+/-</sup> ; <i>Ifnar1</i> <sup>+/-</sup><br>×<br><i>Adar1</i> <sup>+/-</sup> ; <i>Ifnar1</i> <sup>+/-</sup> |        |                              | <i>Adar1</i> <sup>+/+</sup> | <i>Adar1</i> <sup>+/-</sup> | <i>Adar1</i> <sup>-/-</sup> | Total                       | Exp.     |
|                                                                                                                               |        | <i>Ifnar1</i> <sup>+/+</sup> | 15                          | 30                          | 0                           | 45                          | 48.75    |
|                                                                                                                               |        | <i>Ifnar1</i> <sup>+/-</sup> | 34                          | 59                          | 0                           | 93                          | 97.50    |
|                                                                                                                               |        | <i>Ifnar1</i> <sup>-/-</sup> | 12                          | 45                          | 0                           | 57                          | 48.75    |
|                                                                                                                               |        | Total                        | 61                          | 134                         | 0                           | 195                         |          |
|                                                                                                                               | Exp.   | 48.75                        | 97.50                       | 48.75                       |                             |                             |          |

**Table S2, Related to Figure 2. Biological Process GO Term and transcripts significantly upregulated in *Adar1* E11.5 embryos relative to *Adar1*; *Mavs* and wildtype embryos.**

| GOTERM_BP_FAT                              | Count | %   | p-value  | Benjamini |
|--------------------------------------------|-------|-----|----------|-----------|
| Immune response                            | 19    | 5.0 | 4.90E-18 | 1.00E-15  |
| Response to virus                          | 10    | 2.6 | 1.50E-13 | 1.60E-11  |
| Innate immune response                     | 6     | 1.6 | 6.40E-06 | 4.50E-04  |
| Defense response                           | 8     | 2.1 | 1.00E-04 | 5.30E-03  |
| Negative regulation of viral reproduction  | 2     | 0.5 | 5.00E-03 | 1.90E-01  |
| Cytokine-mediated signaling pathway        | 3     | 0.8 | 8.60E-03 | 2.60E-01  |
| ISG15-protein conjugation                  | 2     | 0.5 | 1.00E-02 | 2.60E-01  |
| Regulation of interferon-alpha production  | 2     | 0.5 | 1.70E-02 | 3.70E-01  |
| Regulation of viral reproduction           | 2     | 0.5 | 2.00E-02 | 3.80E-01  |
| Response to exogenous dsRNA                | 2     | 0.5 | 3.00E-02 | 4.70E-01  |
| Regulation of interferon-beta production   | 2     | 0.5 | 3.40E-02 | 4.90E-01  |
| Regulation of type I interferon production | 2     | 0.5 | 3.70E-02 | 4.80E-01  |
| Response to dsRNA                          | 2     | 0.5 | 5.40E-02 | 5.90E-01  |

  

| Gene Name            | Locus Name (Cufflinks) | <i>Adar1</i> ; <i>Mavs</i> | <i>Adar1</i> | log <sub>2</sub> (Fold Change) | p-value  | q-value (Benjamini-Hochberg) |
|----------------------|------------------------|----------------------------|--------------|--------------------------------|----------|------------------------------|
| <i>Apol9b</i>        | XLOC_094945            | 0.00                       | 1.26         | 1.80E+308                      | 7.52E-06 | 6.47E-03                     |
| <i>Gm4951</i>        | XLOC_128259            | 0.00                       | 2.13         | 1.80E+308                      | 8.42E-05 | 4.89E-02                     |
| <i>Ilti3</i>         | XLOC_138638            | 0.05                       | 22.21        | 8.90E+00                       | 0.00E+00 | 0.00E+00                     |
| <i>I830012O16Rik</i> | XLOC_138639            | 0.02                       | 6.15         | 8.22E+00                       | 6.87E-06 | 6.07E-03                     |
| <i>Mx1</i>           | XLOC_106134            | 0.08                       | 23.03        | 8.21E+00                       | 0.00E+00 | 0.00E+00                     |
| <i>Oas1g</i>         | XLOC_203165            | 0.04                       | 11.79        | 8.18E+00                       | 7.73E-14 | 1.95E-10                     |
| <i>Oas1b</i>         | XLOC_202010            | 0.11                       | 27.85        | 7.99E+00                       | 0.00E+00 | 0.00E+00                     |
| <i>Mx2</i>           | XLOC_105462            | 0.14                       | 29.98        | 7.75E+00                       | 2.29E-13 | 5.63E-10                     |
| <i>Isg15</i>         | XLOC_187036            | 0.36                       | 63.07        | 7.43E+00                       | 0.00E+00 | 0.00E+00                     |
| <i>Gbp3</i>          | XLOC_168972            | 0.08                       | 10.29        | 7.09E+00                       | 1.41E-07 | 1.78E-04                     |
| <i>Oas1a</i>         | XLOC_203166            | 0.28                       | 34.31        | 6.95E+00                       | 0.00E+00 | 0.00E+00                     |
| <i>Irgm1</i>         | XLOC_038421            | 0.36                       | 41.76        | 6.85E+00                       | 0.00E+00 | 0.00E+00                     |
| <i>Rsad2</i>         | XLOC_053856            | 0.13                       | 14.71        | 6.79E+00                       | 4.22E-15 | 1.22E-11                     |
| <i>Rtp4</i>          | XLOC_105122            | 0.18                       | 18.56        | 6.67E+00                       | 0.00E+00 | 0.00E+00                     |
| <i>Usp18</i>         | XLOC_220522            | 0.96                       | 93.07        | 6.61E+00                       | 0.00E+00 | 0.00E+00                     |
| <i>Oasl2</i>         | XLOC_201950            | 0.24                       | 22.78        | 6.55E+00                       | 0.00E+00 | 0.00E+00                     |
| <i>Nlrc5</i>         | XLOC_254311            | 0.03                       | 2.63         | 6.38E+00                       | 1.67E-10 | 3.05E-07                     |
| <i>Sp100</i>         | XLOC_000666            | 0.08                       | 4.59         | 5.90E+00                       | 1.61E-07 | 2.00E-04                     |
| <i>Gbp2</i>          | XLOC_168974            | 0.11                       | 6.34         | 5.81E+00                       | 9.55E-13 | 2.23E-09                     |
| <i>Bst2</i>          | XLOC_254937            | 6.16                       | 306.37       | 5.64E+00                       | 0.00E+00 | 0.00E+00                     |
| <i>Gbp7</i>          | XLOC_168971            | 0.09                       | 4.39         | 5.62E+00                       | 0.00E+00 | 0.00E+00                     |
| <i>Oasl1</i>         | XLOC_201951            | 0.30                       | 14.06        | 5.57E+00                       | 3.49E-10 | 6.01E-07                     |
| <i>Irgm2</i>         | XLOC_036933            | 0.23                       | 10.73        | 5.56E+00                       | 3.42E-14 | 8.95E-11                     |
| <i>Rnf213</i>        | XLOC_037880            | 1.91                       | 85.12        | 5.47E+00                       | 5.00E-12 | 1.02E-08                     |
| <i>Parp14</i>        | XLOC_105743            | 0.16                       | 6.59         | 5.39E+00                       | 4.27E-12 | 9.11E-09                     |
| <i>Zbp1</i>          | XLOC_150091            | 0.06                       | 2.43         | 5.36E+00                       | 1.71E-05 | 1.28E-02                     |
| <i>Ilti1</i>         | XLOC_148677            | 0.24                       | 9.42         | 5.32E+00                       | 6.74E-11 | 1.27E-07                     |
| <i>Tnfrsf10</i>      | XLOC_167987            | 0.02                       | 0.53         | 5.10E+00                       | 2.54E-06 | 2.55E-03                     |
| <i>Ilti3</i>         | XLOC_239976            | 3.90                       | 131.04       | 5.07E+00                       | 0.00E+00 | 0.00E+00                     |
| <i>Stat1</i>         | XLOC_000439            | 2.47                       | 80.27        | 5.02E+00                       | 2.22E-14 | 6.06E-11                     |
| <i>Igtp</i>          | XLOC_036932            | 1.23                       | 38.42        | 4.96E+00                       | 0.00E+00 | 0.00E+00                     |
| <i>D14Ert668e</i>    | XLOC_082583            | 0.04                       | 1.27         | 4.85E+00                       | 1.55E-06 | 1.64E-03                     |
| <i>Parp12</i>        | XLOC_220956            | 1.33                       | 37.89        | 4.84E+00                       | 0.00E+00 | 0.00E+00                     |
| <i>Ddx58</i>         | XLOC_185588            | 2.17                       | 61.25        | 4.82E+00                       | 0.00E+00 | 0.00E+00                     |
| <i>Iigp1</i>         | XLOC_128262            | 0.27                       | 7.46         | 4.81E+00                       | 6.37E-11 | 1.23E-07                     |
| <i>Samd9l</i>        | XLOC_220800            | 0.09                       | 2.42         | 4.70E+00                       | 0.00E+00 | 0.00E+00                     |
| <i>Lgals3bp</i>      | XLOC_039548            | 0.40                       | 9.34         | 4.54E+00                       | 1.73E-06 | 1.77E-03                     |
| <i>Sifn8</i>         | XLOC_038999            | 0.03                       | 0.59         | 4.35E+00                       | 1.98E-06 | 2.01E-03                     |
| <i>F830016B08Rik</i> | XLOC_128261            | 0.02                       | 0.43         | 4.18E+00                       | 7.09E-06 | 6.16E-03                     |
| <i>Hspa1a</i>        | XLOC_117289            | 0.24                       | 4.10         | 4.12E+00                       | 3.11E-15 | 9.25E-12                     |
| <i>Sifn5</i>         | XLOC_037338            | 0.20                       | 3.14         | 3.99E+00                       | 6.14E-05 | 3.79E-02                     |
| <i>Trim21</i>        | XLOC_239557            | 1.67                       | 24.03        | 3.85E+00                       | 0.00E+00 | 0.00E+00                     |
| <i>Xaf1</i>          | XLOC_037145            | 1.07                       | 14.66        | 3.78E+00                       | 1.51E-14 | 4.24E-11                     |
| <i>Hspa1b</i>        | XLOC_117288            | 0.68                       | 8.80         | 3.68E+00                       | 0.00E+00 | 0.00E+00                     |
| <i>Gbp5</i>          | XLOC_168970            | 0.06                       | 0.75         | 3.68E+00                       | 3.29E-07 | 3.94E-04                     |
| <i>Ilt27l1</i>       | XLOC_053617            | 0.99                       | 12.12        | 3.61E+00                       | 7.56E-08 | 1.03E-04                     |
| <i>Tap1</i>          | XLOC_116463            | 1.01                       | 11.79        | 3.54E+00                       | 3.46E-14 | 8.95E-11                     |
| <i>Tor3a</i>         | XLOC_002252            | 1.91                       | 21.08        | 3.47E+00                       | 1.54E-12 | 3.36E-09                     |
| <i>BC006779</i>      | XLOC_150243            | 0.90                       | 9.58         | 3.41E+00                       | 1.77E-11 | 3.49E-08                     |
| <i>Tlr3</i>          | XLOC_254757            | 0.09                       | 0.87         | 3.31E+00                       | 5.37E-09 | 7.98E-06                     |
| <i>Nmi</i>           | XLOC_148617            | 1.26                       | 12.02        | 3.26E+00                       | 2.38E-09 | 3.65E-06                     |
| <i>Cmpk2</i>         | XLOC_053236            | 2.49                       | 22.79        | 3.19E+00                       | 5.20E-06 | 4.86E-03                     |
| <i>Socs1</i>         | XLOC_105523            | 0.79                       | 6.70         | 3.09E+00                       | 1.16E-08 | 1.63E-05                     |
| <i>Oas1c</i>         | XLOC_203163            | 0.34                       | 2.88         | 3.08E+00                       | 6.00E-05 | 3.73E-02                     |
| <i>Lgals9</i>        | XLOC_038958            | 0.38                       | 2.61         | 2.77E+00                       | 1.27E-05 | 9.75E-03                     |
| <i>Sifn2</i>         | XLOC_037340            | 0.56                       | 3.78         | 2.75E+00                       | 1.88E-09 | 2.98E-06                     |
| <i>Psm8</i>          | XLOC_116464            | 0.74                       | 4.26         | 2.52E+00                       | 7.24E-05 | 4.28E-02                     |
| <i>Trim30a</i>       | XLOC_239633            | 1.49                       | 8.50         | 2.51E+00                       | 1.60E-06 | 1.66E-03                     |
| <i>Zc3hav1</i>       | XLOC_220951            | 3.08                       | 14.74        | 2.26E+00                       | 7.99E-08 | 1.06E-04                     |
| <i>Ilti2</i>         | XLOC_138637            | 0.86                       | 3.53         | 2.04E+00                       | 7.86E-07 | 8.77E-04                     |
| <i>A230004M16Rik</i> | XLOC_036556            | 2.38                       | 8.10         | 1.77E+00                       | 2.31E-05 | 1.66E-02                     |

**Table S3, Related to Figure 4. RLTR10C-flanked MMERVK10C and IAPLTR1-flanked IAPeZ transposable elements changing in *Adar1*; *Mavs* E15.5 liver versus *Mavs*. Co-ordinates are for NCBI37/mm9 assembly. Total number of mapped reads: *Mavs*, 54,000,000; *Adar1*; *Mavs*, 64,000,000.**

| TE                | Chr | Start       | End         | Strand | log <sub>2</sub> FC | log <sub>2</sub> CPM | Counts ( <i>Mavs</i> ) | Counts ( <i>Adar1</i> ; <i>Mavs</i> ) | qRT-PCR primer sets |
|-------------------|-----|-------------|-------------|--------|---------------------|----------------------|------------------------|---------------------------------------|---------------------|
| RLTR10C-MMERVK10C | 5   | 15,187,632  | 15,194,869  | -      | 8.0175              | -0.8423              | 0                      | 59                                    | iv                  |
|                   | 5   | 15,054,856  | 15,062,032  | -      | 5.7100              | 0.1488               | 2                      | 116                                   | iii, vii, xi        |
|                   | 13  | 23,352,381  | 23,359,527  | +      | 2.7190              | 0.7107               | 23                     | 153                                   | vi                  |
|                   | 13  | 58,241,432  | 58,248,529  | -      | 3.2099              | -0.5327              | 7                      | 79                                    | ii, viii            |
|                   | 14  | 56,415,873  | 56,423,313  | +      | 2.0484              | -0.1239              | 19                     | 79                                    |                     |
|                   | 5   | 100,415,544 | 100,422,649 | -      | 1.6765              | -0.5751              | 17                     | 55                                    |                     |
|                   | 13  | 24,860,274  | 24,863,990  | -      | 1.4096              | 3.8102               | 414                    | 1100                                  |                     |
|                   | 3   | 96,117,385  | 96,124,499  | -      | 1.1613              | 3.2446               | 316                    | 707                                   |                     |
|                   | 12  | 8,627,820   | 8,634,932   | -      | 0.8309              | -0.1430              | 35                     | 62                                    |                     |
|                   | 13  | 93,386,879  | 93,395,379  | -      | 0.2049              | 1.7780               | 172                    | 198                                   |                     |
|                   | 8   | 3,945,963   | 3,952,931   | -      | 0.1621              | 1.8987               | 190                    | 213                                   |                     |
|                   | 18  | 54,029,084  | 54,036,235  | -      | 0.0236              | 0.6322               | 83                     | 84                                    |                     |
|                   | 18  | 6,796,375   | 6,803,515   | -      | -0.2883             | 0.7505               | 100                    | 82                                    |                     |
|                   | 8   | 34,480,312  | 34,485,057  | +      | -0.3431             | 2.0943               | 258                    | 209                                   |                     |
|                   | 4   | 109,368,480 | 109,373,507 | -      | -0.4193             | 1.8825               | 228                    | 170                                   |                     |
|                   | 3   | 96,312,129  | 96,319,233  | -      | -6.3183             | 1.9785               | 442                    | 5                                     | i, v                |
| IAPLTR1-IAPeZ     | 6   | 28,874,174  | 28,879,353  | -      | 5.5295              | -0.8807              | 1                      | 57                                    |                     |
|                   | 4   | 126,685,763 | 126,692,935 | +      | 2.2903              | 0.1473               | 20                     | 99                                    |                     |
|                   | 4   | 147,207,610 | 147,214,767 | -      | 0.7340              | 0.0222               | 41                     | 68                                    |                     |
|                   | 13  | 112,484,442 | 112,491,030 | -      | 0.4150              | 0.2519               | 55                     | 73                                    |                     |
|                   | 18  | 21,420,271  | 21,427,386  | +      | 0.2248              | 0.4926               | 70                     | 82                                    |                     |
|                   | 7   | 86,481,951  | 86,487,482  | -      | 0.2195              | 2.4415               | 271                    | 316                                   |                     |
|                   | 11  | 105,889,559 | 105,894,874 | -      | 0.1357              | 2.1286               | 225                    | 247                                   |                     |
|                   | 4   | 41,401,767  | 41,407,033  | +      | 0.1240              | 1.7011               | 168                    | 183                                   |                     |
|                   | 12  | 74,411,979  | 74,416,847  | -      | 0.1022              | 6.8835               | 6150                   | 6602                                  |                     |
|                   | 1   | 129,788,561 | 129,793,831 | -      | -0.0080             | 0.0484               | 56                     | 56                                    |                     |
|                   | 8   | 74,752,127  | 74,756,849  | -      | -0.1072             | 0.0986               | 60                     | 56                                    |                     |
|                   | 8   | 23,661,639  | 23,668,765  | +      | -0.1291             | 0.0879               | 60                     | 55                                    |                     |
|                   | 2   | 84,345,366  | 84,350,578  | +      | -0.1817             | 0.9637               | 112                    | 99                                    |                     |
|                   | 12  | 32,712,887  | 32,717,249  | +      | -0.3026             | 0.7584               | 101                    | 82                                    |                     |
|                   | 16  | 32,148,162  | 32,153,425  | +      | -0.5155             | 0.6369               | 99                     | 69                                    |                     |
|                   | 11  | 116,250,718 | 116,256,023 | +      | -0.8876             | 0.9523               | 136                    | 73                                    |                     |
|                   | 2   | 154,179,998 | 154,185,328 | +      | -1.4739             | -0.4422              | 59                     | 21                                    |                     |
|                   | 6   | 31,749,369  | 31,754,637  | -      | -1.6161             | 0.1500               | 91                     | 30                                    |                     |

**Table S4, related to Figures 3, 4, 5. Primers used for qRT-PCR.**

| Name                                                             | Sequence 5' to 3'                                      | Description                                                              | Accession Number          |
|------------------------------------------------------------------|--------------------------------------------------------|--------------------------------------------------------------------------|---------------------------|
| Actb-Oligo(dT)                                                   | F ACATTGGCATGGCTTTGTTT<br>R GTTTGCTCCAACCACTGCT        | Beta actin gene; 3' UTR                                                  | GenBank<br>NM_007393.3    |
| Cxcl10-Oligo(dT)                                                 | F TCCTTGTCTCCTAGCTCA<br>R ATAACCCCTTGGGAAGATGG         | Chemokine (C-X-C motif) ligand 10 gene; 3' UTR                           | GenBank<br>NM_021274.1    |
| Ddx58-Oligo(dT)                                                  | F ACTCCCCTTCCAGGACATTT<br>R ACTGTTGACCTCCAGGGTTG       | DEAD (Asp-Glu-Ala-Asp) box polypeptide 58 gene; 3' UTR                   | GenBank<br>NM_172689.3    |
| Eif2ak2-Oligo(dT)                                                | F TGCCGTGGTTTTCTTTAAC<br>R CAGGCCAGCAATTAACAAT         | Eukaryotic translation initiation factor 2-alpha kinase 2 gene; 3' UTR   | GenBank<br>NM_011163.4    |
| Ifi2712a-Oligo(dT)                                               | F TCAGCTCAACTCAAAGCCTGT<br>R TTTTAGGAACACCAGCCCATTA    | Interferon alpha-inducible protein 27 like 2A gene; 3' UTR               | GenBank<br>NM_029803.2    |
| Ifi1-Oligo(dT)                                                   | F CCCTGTCTAGCAGGCAATTC<br>R GGACATTAGCAAAGGGTGGGA      | Interferon-induced protein with tetratricopeptide repeats 1 gene; 3' UTR | GenBank<br>NM_008331.3    |
| Ifi1-RP                                                          | F AGAGAGTCAAGGCAGGTTTCTG<br>R ATTCTCTCCCATGGTTGCTG     | Interferon-induced protein with tetratricopeptide repeats 1 gene; exonic | GenBank<br>NM_008331.3    |
| Ifi3-RP                                                          | F TTTCCCATCAGCACAGAAAC<br>R TTCAGCTGTGGAAGGATCG        | Interferon-induced protein with tetratricopeptide repeats 3 gene; exonic | GenBank<br>NM_010501.2    |
| Ifna1-Oligo(dT)                                                  | F CTGCTGGCTGTGAGGAAATA<br>R CACATTGGCAGAGGAAGACA       | Interferon alpha gene; 3' UTR                                            | GenBank<br>NM_010502.2    |
| Ifnb1-Oligo(dT)                                                  | F GCCTCAGAAATGAGTGGTGGT<br>R TCTGTTTTCTTTGACCTTTCA     | Interferon beta gene; 3' UTR                                             | GenBank<br>NM_010510.1    |
| Irf3-Oligo(dT)                                                   | F CAAGGCTCAGTCTTCCCATC<br>R CGTAGGGACAATGTGTGTC        | Interferon regulatory factor 3 gene; 3' UTR                              | GenBank<br>NM_016849.4    |
| Irf7-Oligo(dT)                                                   | F TCTCGGCTTGTGCTTGTCTA<br>R TTGGGAGTTGGGATTCTGAG       | Interferon regulatory factor 7 gene; 3' UTR                              | GenBank<br>NM_016850.3    |
| Isg15-RP                                                         | F TAATTCAGGGGACCTAGAGC<br>R ACACCAGGAAATCGTTACCC       | ISG15 ubiquitin-like modifier gene; exonic                               | GenBank<br>NM_015783.3    |
| Myd88-Oligo(dT)                                                  | F ACTGGCCTGAGCAACTAGGA<br>R TGTCCCAAGGAAACACACA        | Myeloid differentiation primary response gene (88); 3' UTR               | GenBank<br>NM_010851.2    |
| Mx1-RP                                                           | F TGGGAAGCACTGTCTGGAGTC<br>R CTCAATTTTCAGCACCAGAGG     | Myxovirus (influenza virus) resistance 1 gene; exonic                    | GenBank<br>NM_010846.1    |
| Xaf1-Oligo(dT)                                                   | F GCTGGATTCCGAAGATTGAA<br>R AGGAAAGGAAGCTGGAAAGC       | XIAP associated factor 1 gene; 3' UTR                                    | GenBank<br>NM_001037713.3 |
| Actb-RP<br>(Young et al., 2007)                                  | F CAGCTTCTTTGACGTCCTT<br>R CACGATGGAGGGGAATACAG        | Beta actin gene; exonic                                                  | GenBank<br>X03672.1       |
| MMERVK10C-i                                                      | F CCAATCAGGGTATGAGACACG*<br>R AAAGACCTTTTGCCCAGAGC     | RLTR10C long terminal repeat; 5' & 3'                                    | Repbase<br>RLTR10B2       |
| MMERVK10C-ii                                                     | F AACCAATCCGGGTATGAGAC<br>R GATTGCAGAGGCGAAAAGAC       | RLTR10C long terminal repeat; 5' & 3'                                    | Repbase<br>RLTR10B2       |
| MMERVK10C-iii                                                    | F CTGGGCTTGAAGTCTTTTCG<br>R GAAGAATGACGCTGCAACAG       | RLTR10C long terminal repeat; 5'                                         | Repbase<br>RLTR10B2       |
| MMERVK10C-iv                                                     | F ATCTTCAGGCAAGAGCGAAG<br>R ACAGTCTGTTTTGCGGGAAAC      | Internal region of MERVK10C; 5' UTR                                      | Repbase<br>MMERVK10C      |
| MMERVK10C-v                                                      | F GAAGGGCAGCGACTTTGTAG<br>R GCGCGCATCTTCTTTTTC         | Internal region of MERVK10C; gag                                         | Repbase<br>MMERVK10C      |
| MMERVK10C-vi                                                     | F ACCATGGAAAGGGAAAGGAC<br>R CCCTGCATTGAAAGAGGTC        | Internal region of MERVK10C; gag                                         | Repbase<br>MMERVK10C      |
| MMERVK10C-vii                                                    | F TCAGCAGGATTGGACATCTG<br>R AGGCCACTTTATCCTTTGG        | Internal region of MERVK10C; gag/pro                                     | Repbase<br>MMERVK10C      |
| MMERVK10C-viii                                                   | F TGCTTCTGGGCCTGTTAATC<br>R AAAAGCCCTGTCCCTTCCTTC      | Internal region of MERVK10C; pro                                         | Repbase<br>MMERVK10C      |
| MMERVK10C-ix<br>(Reichmann et al., 2012)                         | F CTTACCCTGCAAAGGTGGA<br>R TGGATGCCACACAACCTATT        | Internal region of MERVK10C; env                                         | Repbase<br>MMERVK10C      |
| MMERVK10C-x<br>(Reichmann et al., 2012))                         | F CCATATGCTGTGGACTGGTG<br>R GCCGTTTTCAATGGCTAAAA       | Internal region of MERVK10C; env                                         | Repbase<br>MMERVK10C      |
| MMERVK10C-xi<br>(Reichmann et al., 2012)                         | F CCAATCAGGGTATGAGACACG*<br>R AAGAACGACACTGCAACAGG     | RLTR10C long terminal repeat; 3'                                         | Repbase<br>RLTR10B2       |
| Control dsRNA<br>(Vitali and Scadden, 2010)                      | F GGUCCGGCUCUCCCCAAUGdTdT<br>R dTdTCCAGGCCGAGGGGUUUUAC | Short double stranded RNA oligonucleotide                                | -                         |
| IU dsRNA<br>(Vitali and Scadden, 2010)Vitali and Scadden, 2010)) | F GGUCCGGCIIUICCAAUGdTdT<br>R dTdTCCAGGCCGUUIUGGUUUUAC | Short double stranded RNA oligonucleotide                                | -                         |

\* Identical oligomers



## SUPPLEMENTAL REFERENCE

Hartner, J.C., Schmittwolf, C., Kispert, A., Muller, A.M., Higuchi, M., and Seeburg, P.H. (2004). Liver Disintegration in the Mouse Embryo Caused by Deficiency in the RNA-editing Enzyme ADAR1. *J Biol Chem* 279, 4894-4902.

Karimi, M.M., Goyal, P., Maksakova, I.A., Bilenky, M., Leung, D., Tang, J.X., Shinkai, Y., Mager, D.L., Jones, S., Hirst, M., *et al.* (2011). DNA methylation and SETDB1/H3K9me3 regulate predominantly distinct sets of genes, retroelements, and chimeric transcripts in mESCs. *Cell Stem Cell* 8, 676-687.

Kowalinski, E., Lunardi, T., McCarthy, A.A., Louber, J., Brunel, J., Grigorov, B., Gerlier, D., and Cusack, S. (2011). Structural basis for the activation of innate immune pattern-recognition receptor RIG-I by viral RNA. *Cell* 147, 423-435.

Livak, K.J., and Schmittgen, T.D. (2001). Analysis of relative gene expression data using real-time quantitative PCR and the 2(-Delta Delta C(T)) Method. *Methods* 25, 402-408.

Luo, D., Ding, S.C., Vela, A., Kohlway, A., Lindenbach, B.D., and Pyle, A.M. (2011). Structural insights into RNA recognition by RIG-I. *Cell* 147, 409-422.

Machnicka, M.A., Milanowska, K., Osman Oglou, O., Purta, E., Kurkowska, M., Olchowik, A., Januszewski, W., Kalinowski, S., Dunin-Horkawicz, S., Rother, K.M., *et al.* (2013). MODOMICS: a database of RNA modification pathways--2013 update. *Nucleic Acids Res* 41, D262-267.

Pettersen, E.F., Goddard, T.D., Huang, C.C., Couch, G.S., Greenblatt, D.M., Meng, E.C., and Ferrin, T.E. (2004). UCSF Chimera--a visualization system for exploratory research and analysis. *J Comput Chem* 25, 1605-1612.

Reichmann, J., Crichton, J.H., Madej, M.J., Taggart, M., Gautier, P., Garcia-Perez, J.L., Meehan, R.R., and Adams, I.R. (2012). Microarray analysis of LTR retrotransposon silencing identifies Hdac1 as a regulator of retrotransposon expression in mouse embryonic stem cells. *PLoS Comput Biol* 8, e1002486.

Vitali, P., and Scadden, A.D. (2010). Double-stranded RNAs containing multiple IU pairs are sufficient to suppress interferon induction and apoptosis. *Nat Struct Mol Biol* 17, 1043-1050.

Wormington, M., Searfoss, A.M., and Hurney, C.A. (1996). Overexpression of poly(A) binding protein prevents maturation-specific deadenylation and translational inactivation in *Xenopus* oocytes. *EMBO J* 15, 900-909.

Yoshida, H., Okabe, Y., Kawane, K., Fukuyama, H., and Nagata, S. (2005). Lethal anemia caused by interferon-beta produced in mouse embryos carrying undigested DNA. *Nat Immunol* 6, 49-56.

Young, D.W., Hassan, M.Q., Pratap, J., Galindo, M., Zaidi, S.K., Lee, S.H., Yang, X., Xie, R., Javed, A., Underwood, J.M., *et al.* (2007). Mitotic occupancy and lineage-specific transcriptional control of rRNA genes by Runx2. *Nature* 445, 442-446.
